# Supplementary material for: Monovalent cation selective crown ether containing poly(arylene ether ketone)/SPEEK blend membranes
Source: Royal Society of Chemistry journal article supplement (doi:10.1039/c6ra11566g), 2016-01-01
Supplement: c6ra11566g1.pdf [file c6ra11566g1.pdf]

## **Monovalent cation selective crown ether containing poly(arylene ether ketone)/SPEEK blend membranes**

Sinem Tas,<sup>a</sup> Bram Zoetebier,<sup>b</sup> Mark A. Hempenius,<sup>b</sup> G. Julius Vancso,<sup>b</sup> Kitty Nijmeijer<sup>a\*</sup>

<sup>a</sup> Membrane Science & Technology, MESA<sup>+</sup> Institute for Nanotechnology, University of Twente, P.O. Box 217, 7500 AE Enschede, the Netherlands

<sup>b</sup> Department of Materials Science and Technology of Polymers, MESA<sup>+</sup> Institute for Nanotechnology, University of Twente, P.O. Box 217, 7500 AE Enschede, the Netherlands

Corresponding author:

Kitty Nijmeijer

E-mail: [d.c.nijmeijer@utwente.nl](mailto:d.c.nijmeijer@utwente.nl)

Tel: (+31) (0) 53 489 4185

## Polymer molar mass characteristics

Molar masses of PAEK and CPAEK were determined using a Shimadzu GPC LC-20AD equipped with a Shodex LF-801 column and a refractive index detector, using NMP-containing 0.5 mM LiBr as the eluent. GPC measurements for SPEEK were carried out in NMP-containing 5 mM LiBr, using PSS GRAM analytical 30 Å and 1000 Å GPC columns and a dual detection system consisting of a differential refractometer (Waters model 410) and a differential viscometer (Viscotek model H502). Molar masses were determined relative to narrow polystyrene standards. All sample solutions were prepared at a concentration of 1 mg/mL and filtered through a 0.45 µm PTFE filter prior to a GPC run. The number average molecular weight ( $M_n$ ) and the polydispersity index (PDI) of the polymers are shown in the table below.

**Table S1.** Number average molar mass ( $M_n$ ) and polydispersity index (PDI) of the polymers.

| Polymer | $M_n$ (g/mol) | PDI |
|---------|---------------|-----|
| PAEK    | 16000         | 1.6 |
| CPAEK   | 18000         | 1.8 |
| SPEEK   | 53000         | 2.7 |

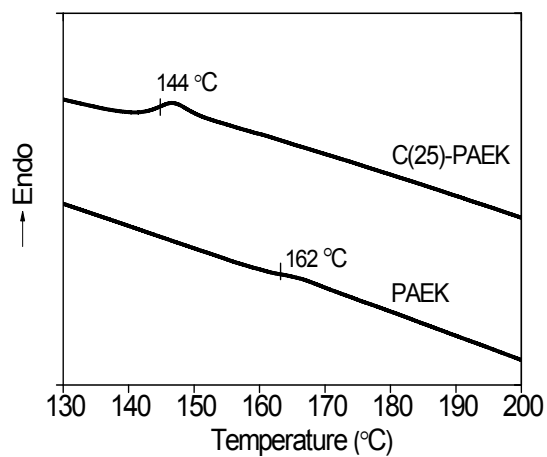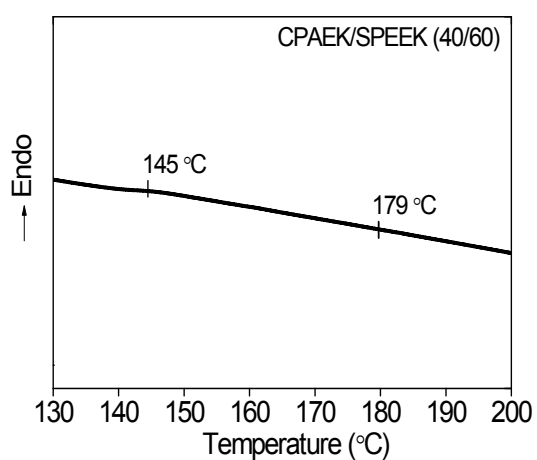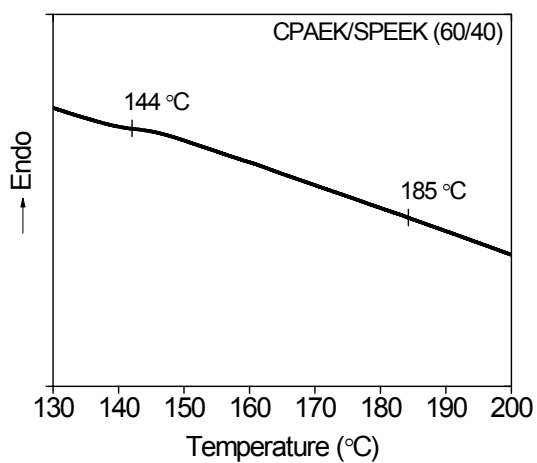

**Fig S1.** DSC graphs of CPAEK, PAEK polymers and CPAEK/SPEEK (40/60), CPAEK/SPEEK (60/40) blend membranes.
